# Supplementary material for: Faster Crystallization during Coral Skeleton Formation Correlates with Resilience to Ocean Acidification
Source: PubMed Central journal article supplement — J Am Chem Soc. 2022 Jan 17;144(3):1332–41. doi: 10.1021/jacs.1c11434 (PMC8796227; doi:10.1021/jacs.1c11434), 2022-01-17
Supplement: ja1c11434_si_001.pdf [file ja1c11434_si_001.pdf]

# Supporting information for Faster crystallization during coral skeleton formation correlates with resilience to ocean acidification

Connor A. Schmidt<sup>1</sup>, Cayla A. Stifler<sup>1</sup>, Emily L. Luffey<sup>1</sup>, Benjamin I. Fordyce<sup>1</sup>, Asiya Ahmed<sup>1</sup>, Gabriela Barreiro Pujol<sup>1</sup>, Carolyn P. Breit<sup>1</sup>, Sydney S. Davison<sup>1</sup>, Connor N. Klaus<sup>1</sup>, Isaac J. Koehler<sup>1</sup>, Isabelle M. LeCloux<sup>1</sup>, Celeo Matute Diaz<sup>1</sup>, Catherine M. Nguyen<sup>1</sup>, Virginia Quach<sup>1</sup>, Jaden S. Sengkhamee<sup>1</sup>, Evan J. Walch<sup>1</sup>, Max M. Xiong<sup>1</sup>, Eric Tambutti<sup>2</sup>, Sylvie Tambutti<sup>2</sup>, Tali Mass<sup>3</sup>, Pupa U.P.A. Gilbert<sup>1,4,5\*</sup>

<sup>1</sup> Department of Physics, University of Wisconsin, Madison, WI 53706, USA.

<sup>2</sup> Department of Marine Biology, Centre Scientifique de Monaco, 98000 Monaco, Principality of Monaco.

<sup>3</sup> University of Haifa, Marine Biology Department, Mt. Carmel, Haifa 31905, Israel.

<sup>4</sup> Chemical Sciences Division, Lawrence Berkeley National Laboratory, Berkeley, CA 94720, USA.

<sup>5</sup> Departments of Chemistry, Materials Science and Engineering, and Geoscience, University of Wisconsin, Madison, WI, 53706, USA.

\* Corresponding author: [pupa@physics.wisc.edu](mailto:pupa@physics.wisc.edu).

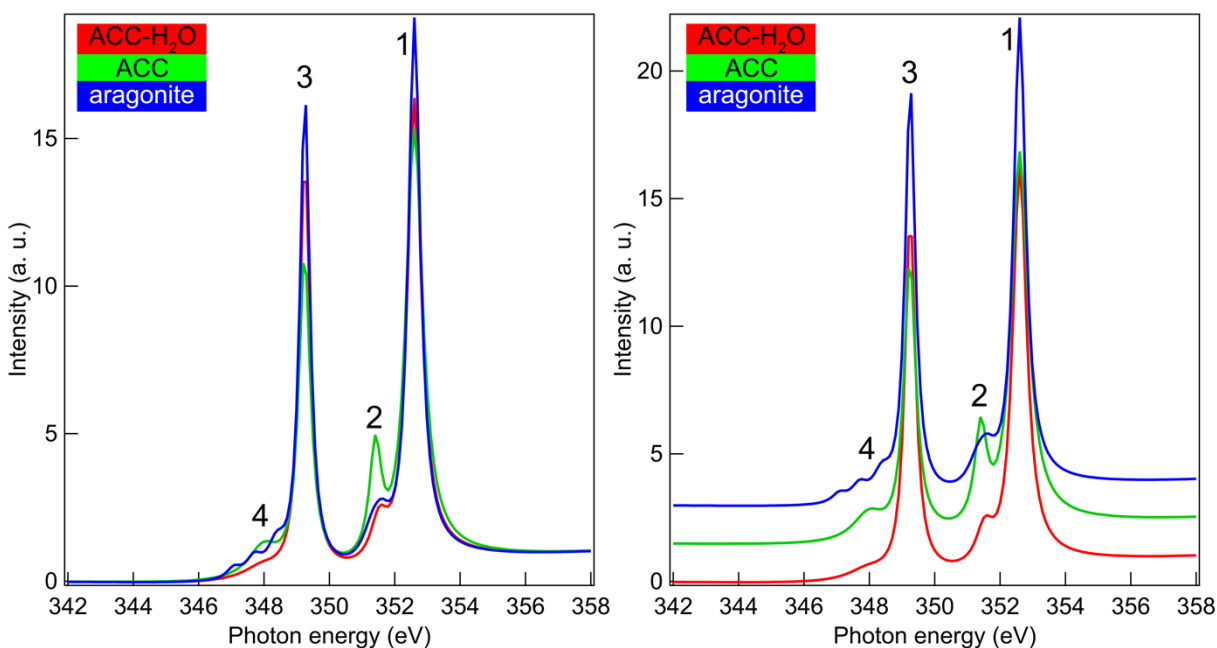

**Figure S1.** The Cni7 component Ca  $L_{2,3}$ -edge spectra, used for all component analyses in this work are presented overlapping (left), and displaced vertically for clarity (right). The aragonite spectrum was obtained by extracting 1441 single pixel spectra from 10 Ca movies, from 2 different coral skeletons, aligning them in energy, averaging them, then peak fitting the average. This strategy was used to eliminate any contributions from noise, both statistical (eliminated by peak fitting) and non-statistical (minimized by using spectra from multiple movies). The ACC-H<sub>2</sub>O and ACC spectra were extracted from 60 single pixel spectra from 15 Ca movies, all acquired in regenerating sea urchin spines, and previously used as component spectra in Albéric et al. 2019<sup>1</sup>. The 3 spectra were aligned to one another in amplitude and energy between 340 eV and 360 eV, then shifted in energy so the peak 1 was at 352.6 eV, a linear fit to the pre-edge background was subtracted from each of the 3 spectra, and then each spectrum was peak fitted. During peak fitting, 2 arctangents were placed 0.25 eV below peak 3 and peak 1, fixed in position, width, and amplitude, and kept constant for all 3 spectra. Similarly, the background polynomial was fixed and identical for all 3 spectra. These choices were key to obtaining a consistent pre- and post-edge background for all 3 spectra. The results of peak-fitting for the 3 Cni7 component spectra are presented in Table SS. The Cni7 component spectra are included in the Supporting Information as separate .txt files.

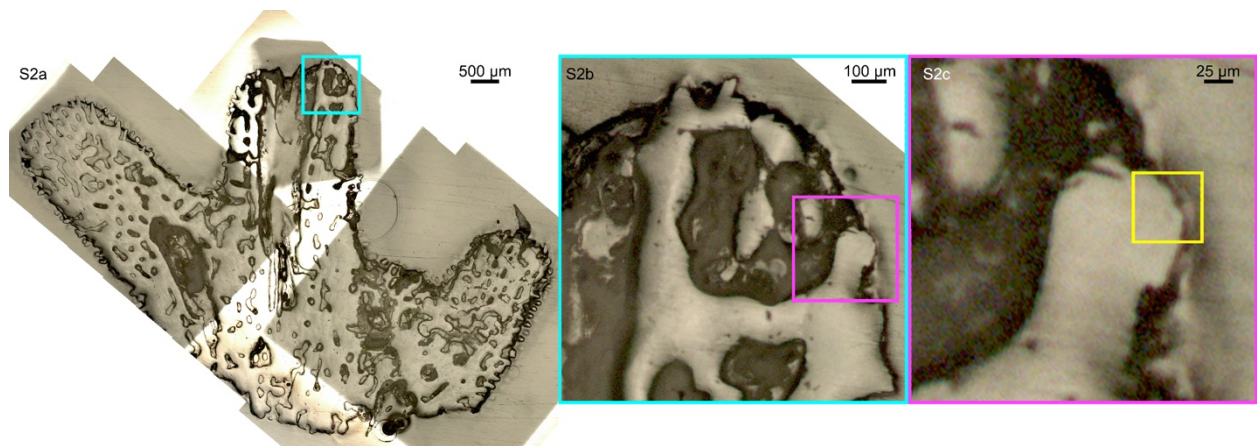

**Figure S2.** PLM images of the *Acropora* sp. sample. Each colored box indicates where the zoomed-in next image was acquired, with the final yellow box indicating the area of PEEM data acquisition in **Figure 2**.

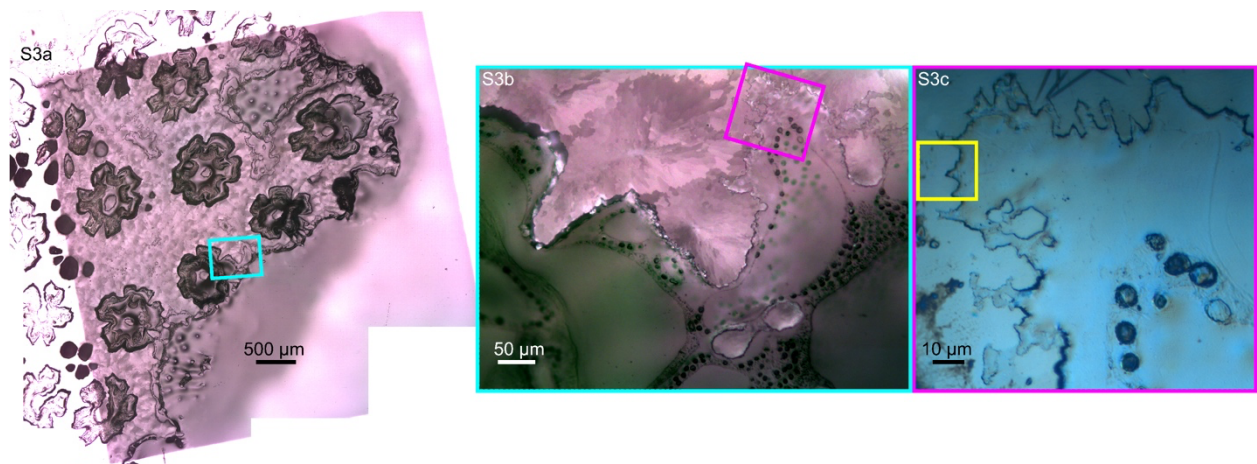

**Figure S3.** PLM images (**S3a**, **S3b**) and DIC image (**S3c**) of the *Stylophora pistillata* sample. Each colored box indicates where the zoomed-in next image was acquired, with the final yellow box indicating the area of PEEM data acquisition in **Figure 3**.

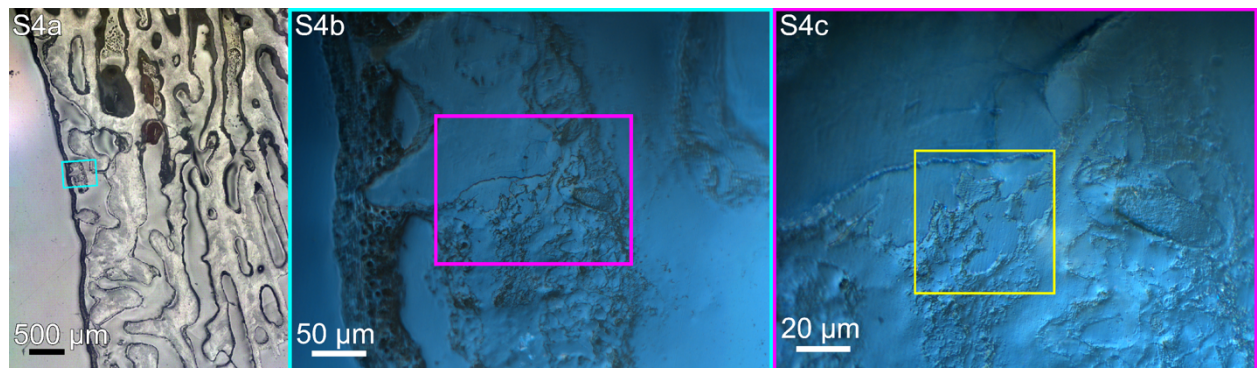

**Figure S4.** PLM image (**S4a**) and DIC images (**S4b**, **S4c**) of the *Turbinaria peltata* sample. Each colored box indicates where the zoomed-in next image was acquired, with the final yellow box indicating the area of PEEM data acquisition in **Figure 4**.

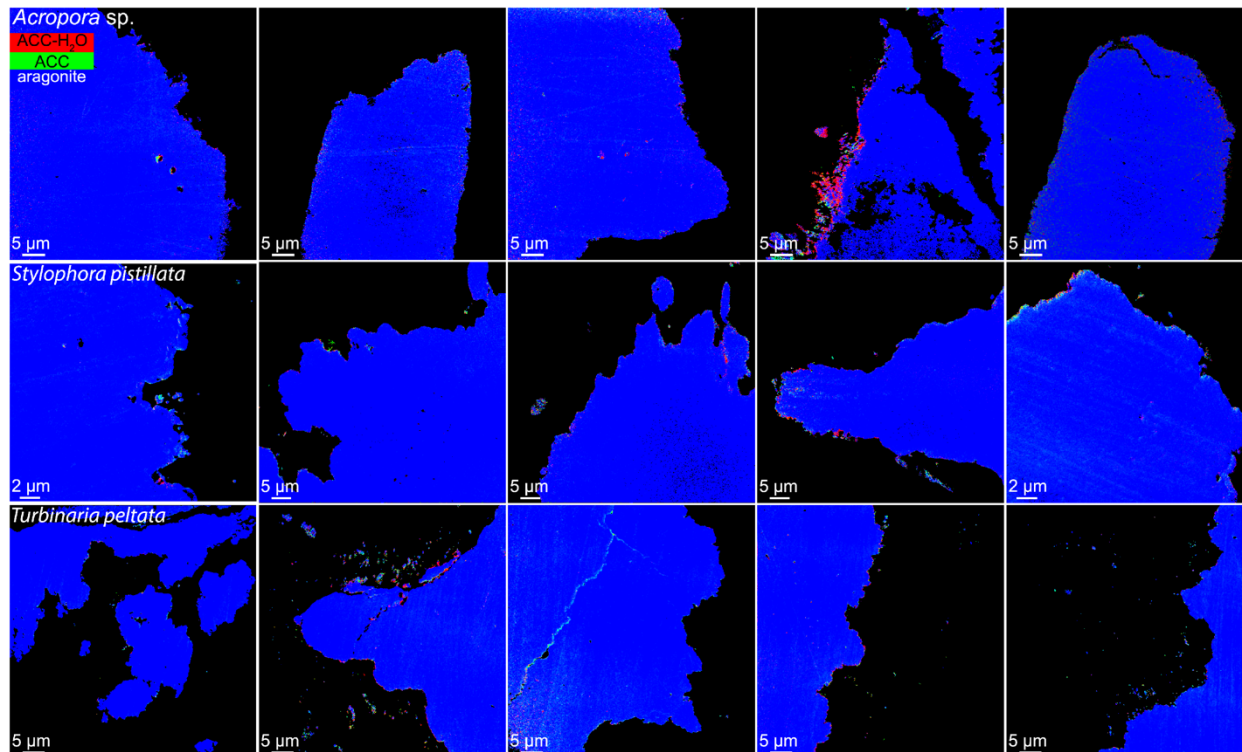

**Figure S5.** Component maps for each area analyzed in **Tables S1-S4**, including those shown in **Figures 2,3,4** on the left. Five areas from *Acropora*, *Stylophora*, and *Turbinaria* are presented in the top row, the middle, and the bottom row, respectively.

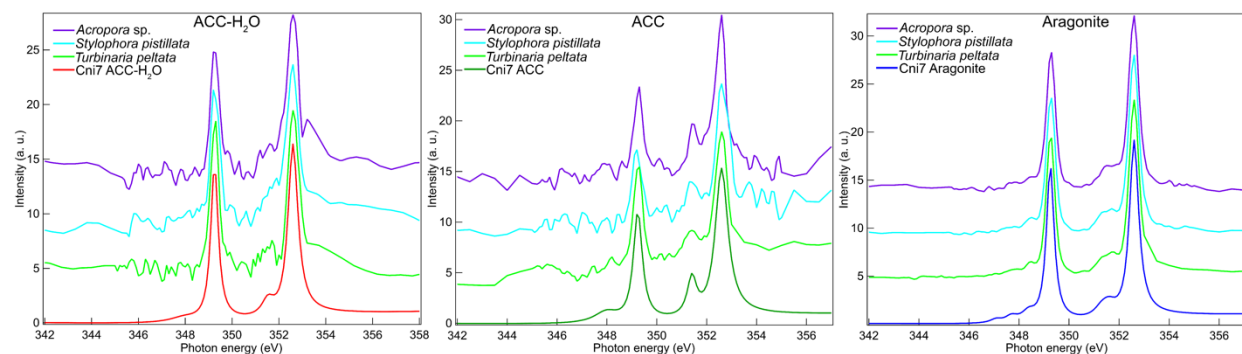

**Figure S6.** Single-pixel Ca L<sub>2,3</sub>-edge ACC-H<sub>2</sub>O, ACC, and aragonite spectra extracted from one of the areas shown in **Figures 2,3,4** (top 3 spectra in each panel), and the ACC-H<sub>2</sub>O, ACC, and aragonite spectrum from the Cni7 component spectra (bottom spectrum). Pixels are 60 nm for *Acropora* and *Turbinaria* data, 20 nm for *Stylophora* data. The selected single-pixel spectra contained over 90% ACC-H<sub>2</sub>O, or ACC, or aragonite, as identified by best-fitting in component mapping. The spectra are displaced vertically for clarity. Spectra from amorphous phases tend to have lower intensity than crystalline ones, leading to spectra with more pronounced noise. This makes sense, as ACC-H<sub>2</sub>O has lower Ca density than ACC, and much lower than aragonite.



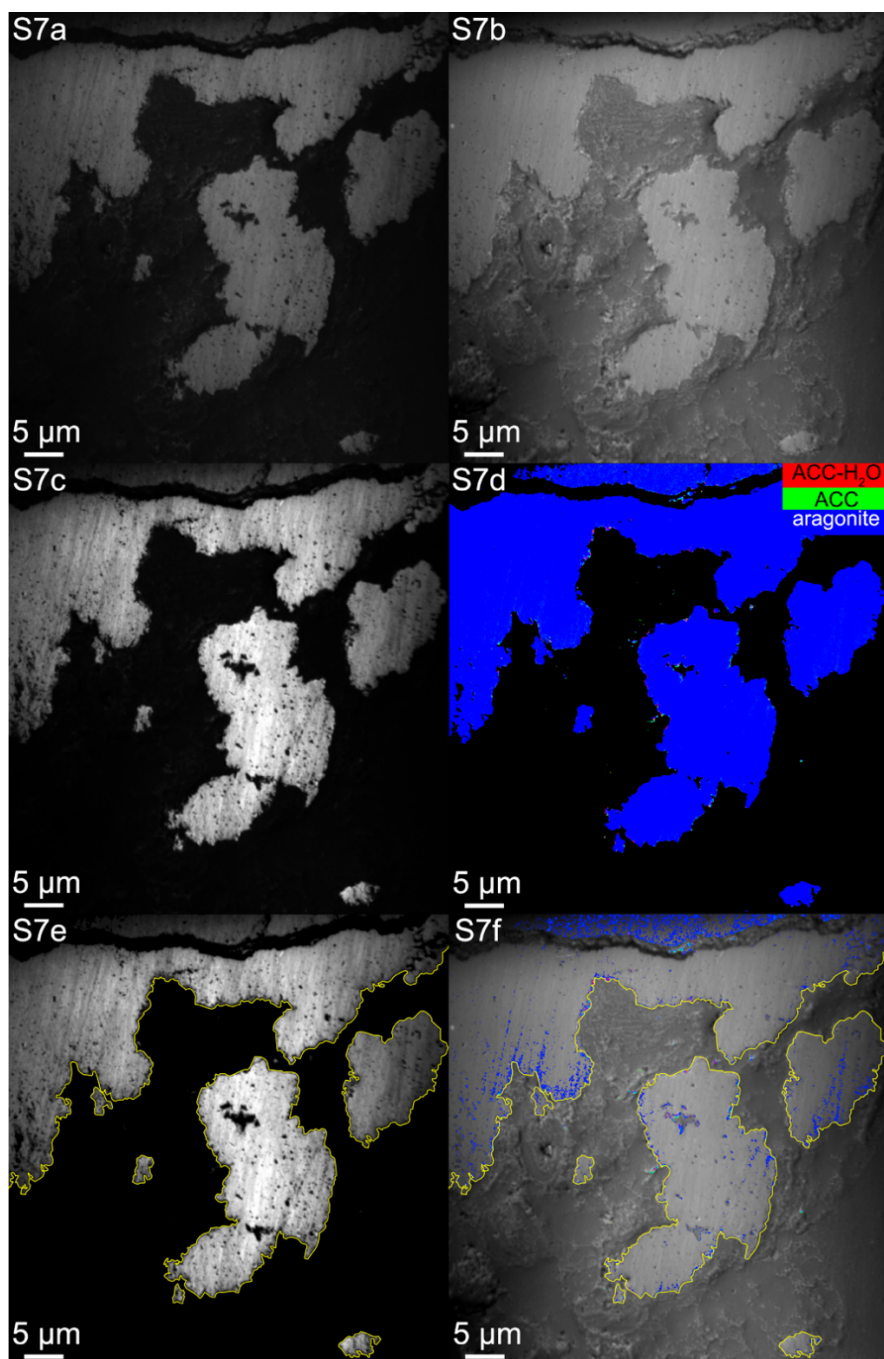

**Figure S7.** *S7a.* PEEM single image, taken on peak 1 at 352.6 eV (*Fig. S1* shows peak numbers). *S7b.* Average image, obtained by digitally averaging all 121 PEEM images in a Ca stack. *S7c.* A Ca concentration map obtained by digital subtraction of images on-peak and off-peak. The on-peak image is the average of 5 images, 1 acquired at the 352.6 eV peak and 4 at  $\pm 0.1$  and  $\pm 0.2$  eV from peak, the off-peak image is the average of 9 images acquired at and around 344 eV. *S7d.* A component map, masked using all 3 masks, the difference mask, the  $\chi^2$  mask, and the manual mask eliminating spurious single-pixels in the epoxy or tissue. *S7e.* The same Ca map in *S7c*, overlaid with the black mask used in component mapping, and the yellow line outlining the skeleton. The yellow line was produced by outlining the black mask in *S7d*, in Adobe Photoshop®, using the “stroke” tool, after selecting only the contiguous skeleton and other skeletal regions not connected in this 2D polished cross-section, presumably connected in 3D, and  $>2 \mu\text{m}$ . *S7f.* Average PEEM image, overlaid with the yellow line defined in *S7e*, and part of the component map in *S7d*, where all epoxy black pixels and aragonite blue pixels were removed, using the Adobe Photoshop® “magic wand” tool, with a tolerance of 26, to retain all amorphous pixels, and eliminate all crystalline or epoxy pixels. This region’s component map, mask, and yellow outline were obtained with precisely the same methods as all others presented in *Figures 2d,3d,4d*, which are analogous to the panel *S7f* here.

Table S1

| genus             | total extra-skeletal volume analyzed ( $\mu\text{m}^3$ ) | # extra-skeletal particles observed | density of extra-skeletal particles (#particles/ $\mu\text{m}^3$ ) | average density of extra-skeletal particles | standard deviation |
|-------------------|----------------------------------------------------------|-------------------------------------|--------------------------------------------------------------------|---------------------------------------------|--------------------|
| <i>Acropora</i>   | 5.19                                                     | 3                                   | 0.6                                                                | 4.0                                         | 2.3                |
|                   | 2.43                                                     | 8                                   | 3.3                                                                |                                             |                    |
|                   | 2.62                                                     | 8                                   | 3.1                                                                |                                             |                    |
|                   | 4.53                                                     | 32                                  | 7.1                                                                |                                             |                    |
|                   | 3.98                                                     | 23                                  | 5.8                                                                |                                             |                    |
| <i>Stylophora</i> | 0.58                                                     | 13                                  | 22.5                                                               | 11.9                                        | 11.9               |
|                   | 4.22                                                     | 15                                  | 3.6                                                                |                                             |                    |
|                   | 5.46                                                     | 8                                   | 1.5                                                                |                                             |                    |
|                   | 6.93                                                     | 14                                  | 2.0                                                                |                                             |                    |
|                   | 0.47                                                     | 14                                  | 29.8                                                               |                                             |                    |
| <i>Turbinaria</i> | 5.31                                                     | 18                                  | 3.4                                                                | 11.9                                        | 10.5               |
|                   | 5.47                                                     | 160                                 | 29.3                                                               |                                             |                    |
|                   | 5.85                                                     | 40                                  | 6.8                                                                |                                             |                    |
|                   | 6.97                                                     | 128                                 | 18.4                                                               |                                             |                    |
|                   | 2.67                                                     | 4                                   | 1.5                                                                |                                             |                    |

**Table S1. Extra-skeletal particle density.** Results from counting the number of particles observed in each area, divided by the total volume of extra-skeletal space analyzed in each area by PEEM with component mapping. Extra-skeletal particles are defined for this purpose as any group of 4 or more contiguous unmasked pixels outside of the skeleton. Extra-skeletal volume analyzed is obtained by the measuring the number of pixels outside the skeleton, converting that into an area in  $\mu\text{m}^2$ , and multiplying it by the  $0.003 \mu\text{m}$  thickness of probed with component mapping. *Stylophora* and *Turbinaria* have areas of high- and low-density of extra-skeletal particles, giving rise to the larger standard deviation measured.

Table S2

| genus             | total # pixels intra-skeletal, not masked | # ACC-H <sub>2</sub> O intra-skeletal pixels | # ACC intra-skeletal pixels | % intra-skeletal amorphous pixels | % intra-skeletal crystalline pixels | average % intra-skeletal amorphous pixels | standard deviation |
|-------------------|-------------------------------------------|----------------------------------------------|-----------------------------|-----------------------------------|-------------------------------------|-------------------------------------------|--------------------|
| <i>Acropora</i>   | 65200                                     | 4416                                         | 6378                        | 16.6                              | 83.4                                | 23.9                                      | 9.2                |
|                   | 93936                                     | 8395                                         | 19086                       | 29.3                              | 70.7                                |                                           |                    |
|                   | 75819                                     | 5820                                         | 6228                        | 15.9                              | 84.1                                |                                           |                    |
|                   | 153553                                    | 20980                                        | 10230                       | 20.3                              | 79.7                                |                                           |                    |
|                   | 110387                                    | 13555                                        | 27626                       | 37.3                              | 62.7                                |                                           |                    |
| <i>Stylophora</i> | 151682                                    | 2855                                         | 11890                       | 9.7                               | 90.3                                | 15.0                                      | 6.6                |
|                   | 113654                                    | 2768                                         | 5481                        | 7.3                               | 92.7                                |                                           |                    |
|                   | 99257                                     | 6778                                         | 9600                        | 16.5                              | 83.5                                |                                           |                    |
|                   | 92290                                     | 6528                                         | 9535                        | 17.4                              | 82.6                                |                                           |                    |
|                   | 175832                                    | 8103                                         | 33889                       | 23.9                              | 76.1                                |                                           |                    |
| <i>Turbinaria</i> | 190544                                    | 1645                                         | 4273                        | 3.1                               | 96.9                                | 12.2                                      | 5.7                |
|                   | 95267                                     | 6065                                         | 8989                        | 15.8                              | 84.2                                |                                           |                    |
|                   | 79155                                     | 1137                                         | 7990                        | 11.5                              | 88.5                                |                                           |                    |
|                   | 59335                                     | 3760                                         | 6918                        | 18.0                              | 82.0                                |                                           |                    |
|                   | 68317                                     | 1201                                         | 7419                        | 12.6                              | 87.4                                |                                           |                    |

**Table S2. Intra-skeletal percentages of amorphous pixels.** Results from counting the number of (#) amorphous pixels in the surface 2 $\mu$ m-thick band of all coral areas analyzed. The # pixels were counted in Adobe Photoshop® as described in the Methods. Only pixels with  $\geq 10\%$  of the relevant phase were counted for each amorphous phase. Crystalline pixels were those with  $>90\%$  aragonite. In the first row of each genus are the data presented in Figures 2,3,4, and in following rows are data from other areas in the genus. Different total pixel counts arise from different fields of view and different amounts of skeletal surface area, so the % amorphous pixels is the most important number. The last two columns show the average % amorphous pixels and the standard deviation for each genus.

Table S3

| genus             | total # pixels extra-skeletal, not masked | # ACC-H <sub>2</sub> O extra-skeletal pixels | # ACC extra-skeletal pixels | % extra-skeletal amorphous pixels | % extra-skeletal crystalline pixels | average % extra-skeletal amorphous pixels ± StDev | average % 1- $\mu$ m-skeleton surface amorphous pixels ± StDev | significant?      |
|-------------------|-------------------------------------------|----------------------------------------------|-----------------------------|-----------------------------------|-------------------------------------|---------------------------------------------------|----------------------------------------------------------------|-------------------|
| <i>Acropora</i>   | 1021                                      | 192                                          | 176                         | 36.0                              | 74.0                                | 63.0<br>± 22.8                                    | 28.9<br>± 10.0                                                 | yes<br>p=0.075    |
|                   | 364                                       | 93                                           | 74                          | 45.9                              | 54.1                                |                                                   |                                                                |                   |
|                   | 18977                                     | 8095                                         | 6865                        | 78.8                              | 21.2                                |                                                   |                                                                |                   |
|                   | 1039                                      | 388                                          | 561                         | 91.3                              | 8.7                                 |                                                   |                                                                |                   |
| <i>Stylophora</i> | 3160                                      | 609                                          | 1922                        | 80.1                              | 19.9                                | 91.2<br>± 8.4                                     | 23.7<br>± 9.1                                                  | yes<br>p=0.000047 |
|                   | 956                                       | 373                                          | 636                         | 100                               | 0.0                                 |                                                   |                                                                |                   |
|                   | 2751                                      | 1016                                         | 1536                        | 92.8                              | 7.2                                 |                                                   |                                                                |                   |
|                   | 1698                                      | 651                                          | 816                         | 86.4                              | 13.6                                |                                                   |                                                                |                   |
|                   | 1415                                      | 538                                          | 749                         | 91.0                              | 9.0                                 |                                                   |                                                                |                   |
| <i>Turbinaria</i> | 700                                       | 133                                          | 312                         | 63.6                              | 36.4                                | 81.9<br>± 11.1                                    | 18.8<br>± 8.6                                                  | yes<br>p=0.00032  |
|                   | 14305                                     | 5438                                         | 7584                        | 91.0                              | 9.0                                 |                                                   |                                                                |                   |
|                   | 1533                                      | 500                                          | 888                         | 90.5                              | 9.5                                 |                                                   |                                                                |                   |
|                   | 4129                                      | 900                                          | 2503                        | 82.4                              | 17.6                                |                                                   |                                                                |                   |

**Table S3. Extra-skeletal percentages of amorphous pixels.** Results from counting the number of (#) amorphous pixels in particles outside the skeleton in all coral areas analyzed, except for one area of *Acropora* and one area of *Turbinaria* that did not contain any extra-skeletal particles. As in [Table S2](#), only pixels with  $\geq 10\%$  of the relevant phase were counted for each amorphous phase. Crystalline pixels were those with  $>90\%$  aragonite. Again, in the first row of each genus are the data presented in [Figures 2,3,4](#), and in following rows are data from other areas in the genus. Again, different total pixel counts arise from different fields of view and different amounts of extra-skeletal particles, so the % amorphous pixels is the most important number. The % of amorphous pixels can be over 100% because ACC and ACC-H<sub>2</sub>O are counted separately, thus, if a pixel has both  $>10\%$  ACC-H<sub>2</sub>O  $>10\%$  ACC it is counted twice. This only occurred in one area, which had 100.6%, and was manually adjusted to 100% amorphous and 0% crystalline, which are physically realistic numbers.

For comparison, in the second to last column we included the % amorphous pixels detected in the outermost 1  $\mu$ m layer of the skeleton, termed “skeleton surface”, which contains the greatest % amorphous pixels compared with any other part of the skeleton. The extra-skeletal particles contain a significantly higher % of amorphous pixels than the most amorphous skeleton surface. The significance and corresponding p-values are indicated in the last column. P-values listed were calculated using a 2-sample t-test, without assuming equal variances.

Table S4

| genus             | Depth in coral skeleton ( $\mu\text{m}$ ) | % amorphous pixels in A194 | % amorphous pixels in A192 | % amorphous pixels in A202 | % amorphous pixels in A196 | % amorphous pixels in A200 | avg % amorphous pixels in 5 areas | standard deviation across 5 areas |
|-------------------|-------------------------------------------|----------------------------|----------------------------|----------------------------|----------------------------|----------------------------|-----------------------------------|-----------------------------------|
| <i>Acropora</i>   | 0.11                                      | 33.4                       | 52.0                       | 68.3                       | 37.2                       | 51.9                       | 48.5                              | 13.9                              |
|                   | 0.26                                      | 27.6                       | 47.8                       | 58.5                       | 30.1                       | 47.2                       | 42.2                              | 13.1                              |
|                   | 0.53                                      | 24.4                       | 42.4                       | 52.0                       | 24.4                       | 38.6                       | 36.4                              | 12.0                              |
|                   | 1                                         | 21.3                       | 36.4                       | 45.3                       | 20.3                       | 28.9                       | 30.4                              | 10.6                              |
|                   | 2                                         | 16.6                       | 29.3                       | 37.3                       | 15.9                       | 20.3                       | 23.9                              | 9.2                               |
|                   | 4                                         | 12.0                       | 21.7                       | 29.3                       | 12.2                       | 16.3                       | 18.3                              | 7.3                               |
| <i>Stylophora</i> | Depth in coral skeleton ( $\mu\text{m}$ ) | % amorphous pixels in S146 | % amorphous pixels in S01  | % amorphous pixels in S11  | % amorphous pixels in S15  | % amorphous pixels in S99  | avg % amorphous pixels in 5 areas | standard deviation across 5 areas |
|                   | 0.125                                     | 31.5                       | 33.4                       | 47.3                       | 58.1                       | 66.2                       | 47.3                              | 15.1                              |
|                   | 0.25                                      | 29.8                       | 27.4                       | 42.0                       | 50.9                       | 61.8                       | 42.4                              | 14.4                              |
|                   | 0.5                                       | 24.7                       | 19.1                       | 33.9                       | 40.4                       | 53.1                       | 34.2                              | 13.3                              |
|                   | 1                                         | 16.9                       | 11.8                       | 24.2                       | 27.5                       | 38.1                       | 23.7                              | 10.2                              |
|                   | 2                                         | 9.7                        | 7.3                        | 16.5                       | 17.4                       | 23.9                       | 15.0                              | 6.6                               |
|                   | 4                                         | 5.6                        | 4.8                        | 11.5                       | 11.3                       | 15.7                       | 9.8                               | 4.5                               |
| <i>Turbinaria</i> | Depth in coral skeleton ( $\mu\text{m}$ ) | % amorphous pixels in T35  | % amorphous pixels in T31  | % amorphous pixels in T37  | % amorphous pixels in T61  | % amorphous pixels in T63  | avg % amorphous pixels in 5 areas | standard deviation across 5 areas |
|                   | 0.16                                      | 22.9                       | 54.2                       | 32.1                       | 73.6                       | 40.5                       | 44.7                              | 19.8                              |
|                   | 0.27                                      | 12.8                       | 44.1                       | 33.4                       | 66.3                       | 32.9                       | 37.9                              | 19.5                              |
|                   | 0.5                                       | 8.5                        | 32.4                       | 24.4                       | 43.3                       | 25.7                       | 26.9                              | 12.7                              |
|                   | 1                                         | 5.2                        | 22.6                       | 17.3                       | 28.7                       | 18.7                       | 18.5                              | 8.6                               |
|                   | 2                                         | 3.1                        | 15.9                       | 11.5                       | 18.0                       | 12.6                       | 12.2                              | 5.7                               |
|                   | 4                                         | 2.2                        | 11.3                       | 8.9                        | 11.5                       | 9.6                        | 8.7                               | 3.8                               |

**Table S4. Intra-skeletal percentages of amorphous pixels vs. distance from surface.** Results from counting the percentage of (%) pixels amorphous pixels (either ACCH<sub>2</sub>O or ACC) within the skeleton surface, at various distances from the surface, indicated by a dotted line in Figures 2,3,4. Each genus was measured in quintuplicate, and all data are averaged over the 5 areas in the last column. These data decay logarithmically, as shown in Figure 5.



Table S5

| Fit parameters            | ACC-H <sub>2</sub> O | ACC               | Aragonite         |
|---------------------------|----------------------|-------------------|-------------------|
| p0                        | <b>-0.22154</b>      | <b>-0.22154</b>   | <b>-0.22154</b>   |
| p1                        | <b>-0.017219</b>     | <b>-0.017219</b>  | <b>-0.017219</b>  |
| p2                        | <b>0.0021331</b>     | <b>0.0021331</b>  | <b>0.0021331</b>  |
| p3                        | <b>0.00020401</b>    | <b>0.00020401</b> | <b>0.00020401</b> |
| pk1 Lorentzian Amplitude  | 12.411               | 14.14             | 12.617            |
| <i>pk1 position</i>       | <b>352.6</b>         | <b>352.6</b>      | <b>352.6</b>      |
| Width                     | 0.51202              | 0.62488           | 0.4439            |
| pk2 Lorentzian Amplitude  | <b>1.55</b>          | <b>2.7</b>        | <b>1.35</b>       |
| <i>pk2 position</i>       | <b>351.53</b>        | <b>351.41</b>     | <b>351.6</b>      |
| Width                     | <b>0.65</b>          | <b>0.45</b>       | <b>0.7</b>        |
| pk3 Lorentzian Amplitude  |                      |                   | <b>1</b>          |
| <i>pk2' position</i>      |                      |                   | <b>351.3</b>      |
| Width                     |                      |                   | <b>0.7</b>        |
| pk4 Lorentzian Amplitude  | 8.5172               | 7.2712            | 9.3555            |
| <i>pk3 position</i>       | <b>349.25</b>        | <b>349.24</b>     | <b>349.25</b>     |
| Width                     | 0.38397              | 0.4326            | 0.36859           |
| pk5 Lorentzian Amplitude  | 1.1156               | 2.0779            | <b>1</b>          |
| <i>pk4 position</i>       | <b>347.95</b>        | <b>347.98</b>     | <b>348.38</b>     |
| Width                     | 0.2                  | 1.1895            | <b>0.65</b>       |
| pk6 Lorentzian Amplitude  |                      |                   | <b>0.6</b>        |
| <i>pk4' position</i>      |                      |                   | <b>347.7</b>      |
| Width                     |                      |                   | <b>0.6</b>        |
| pk7 Lorentzian Amplitude  |                      |                   | <b>0.3</b>        |
| <i>pk4'' position</i>     |                      |                   | <b>347.08</b>     |
| Width                     |                      |                   | <b>0.5322</b>     |
| AT1 Arc-Tangent Amplitude | <b>0.3</b>           | <b>0.3</b>        | <b>0.3</b>        |
| <i>AT1 position</i>       | <b>349</b>           | <b>349</b>        | <b>349</b>        |
| Width                     | <b>0.2</b>           | <b>0.2</b>        | <b>0.2</b>        |
| AT2 Arc-Tangent Amplitude | <b>0.8</b>           | <b>0.8</b>        | <b>0.8</b>        |
| <i>AT2 position</i>       | <b>352.35</b>        | <b>352.35</b>     | <b>352.35</b>     |
| Width                     | <b>0.2</b>           | <b>0.2</b>        | <b>0.2</b>        |

**Table S5. Component spectra peak-fitting parameters.** Cni7 Fit parameters used in peak-fitting the Cni7 component spectra. Values in **bold** were held, that is, not allowed to change during peak fitting in Igor Pro Carbon® using GG Macros<sup>3</sup>. *Red italics* font indicates energy-positions. Aragonite required the use of several more Lorentzian curves than ACC-H<sub>2</sub>O or ACC, so some rows are blank for the amorphous phases. Abbreviations: pk = peak, AT = arctan.

## Supporting references

1. Albéric, M.; Stifler, C. A.; Zou, Z.; Sun, C.-Y.; Killian, C. E.; Valencia, S.; Mawass, M.-A.; Bertinetti, L.; Gilbert, P. U. P. A.; Politi, Y., Growth and regrowth of adult sea urchin spines involve hydrated and anhydrous amorphous calcium carbonate precursors. *Journal of Structural Biology: X* **2019**, *1*, 100004.
2. GG-Macros, <http://home.physics.wisc.edu/gilbert/software.htm> **2021**.
